# Supplementary material
Source: ML conference proceedings conference paper supplement (https://aclanthology.org/2026.semeval-1.433)

# System Prompt

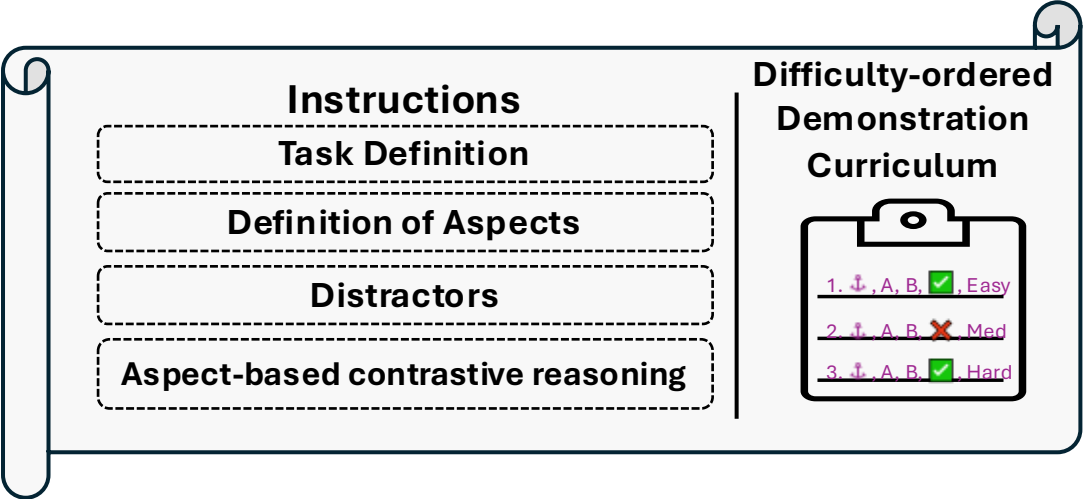

# User Prompt

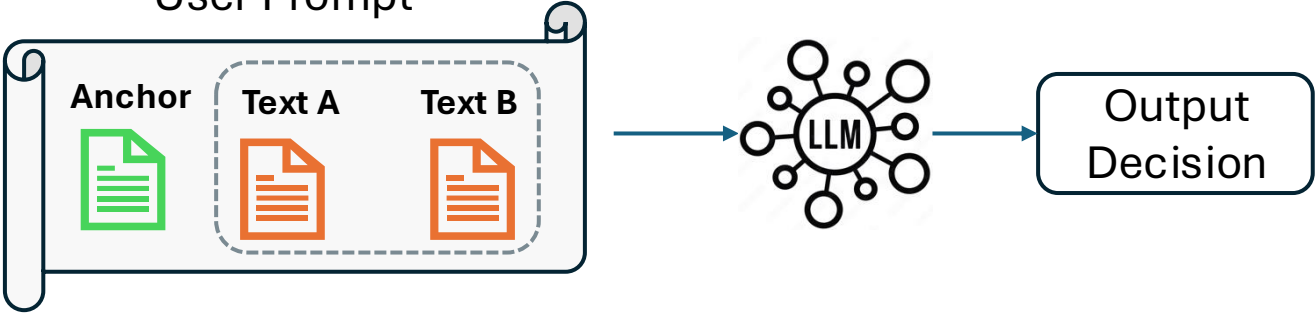

# Annotation Guidelines

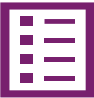

Human Annotator

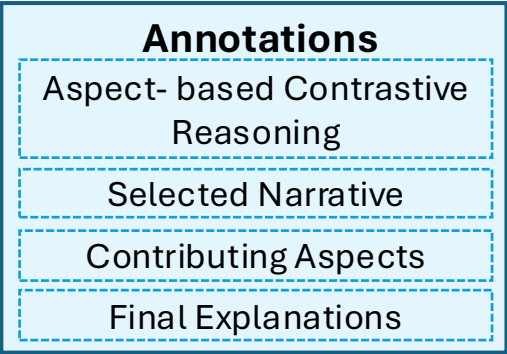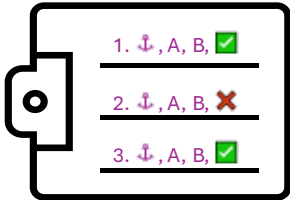

Demonstrations

# Difficulty Scoring Mechanism

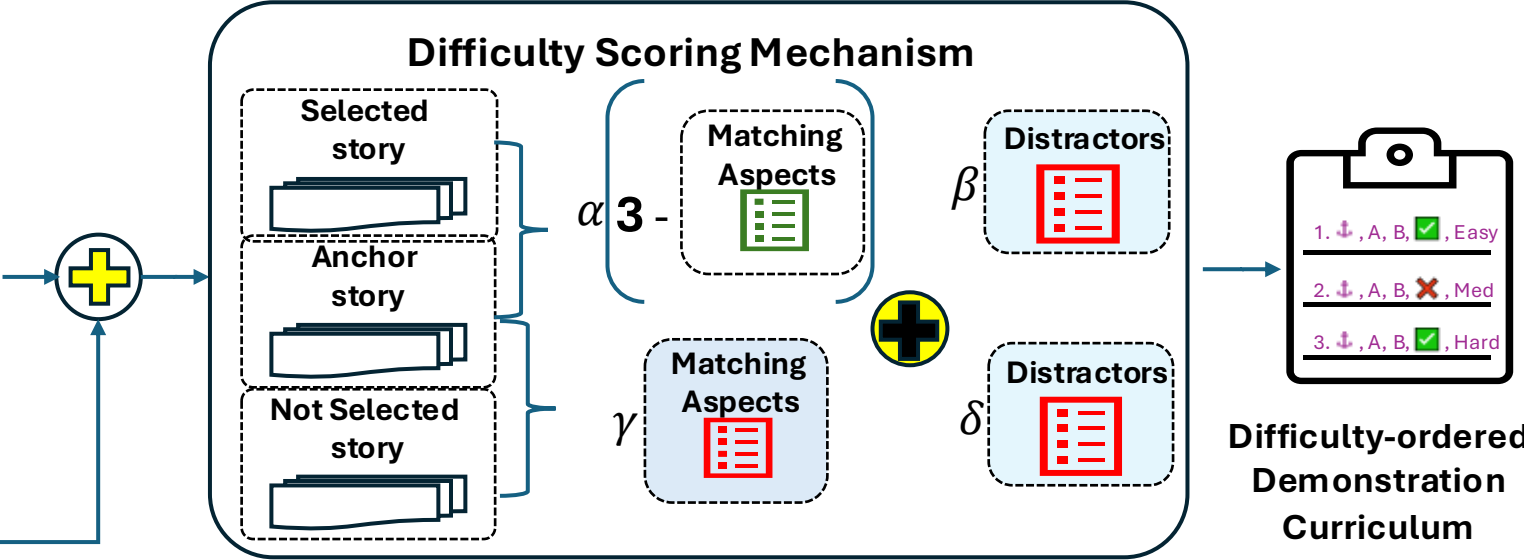

Supplement: SupplementaryMaterial [file methodologynew.pdf › latex/methodologynew.pdf]
