# Supplementary material
Source: ML conference proceedings conference paper supplement (https://aclanthology.org/2026.semeval-1.433)
Supplement: SupplementaryMaterial [file methodologynew1.pdf › latex/methodologynew1.pdf]

## System Prompt

### Instructions

Task Definition

Definition of Aspects

Distractors

Aspect-based contrastive reasoning

### Difficulty-ordered Demonstration Curriculum

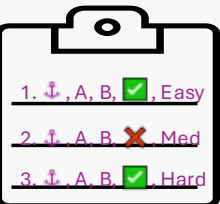

## User Prompt

Anchor

Text A

Text B

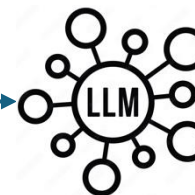

Output  
Decision

## Annotation Guidelines

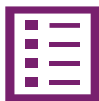

### Annotations

Aspect- based Contrastive Reasoning

Selected Narrative

Contributing Aspects

Final Explanations

Human Annotator

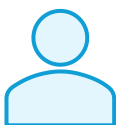

1. A, B, Easy
2. A, B, Med
3. A, B, Hard

Demonstrations

## Difficulty Scoring Mechanism

Selected story

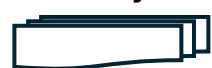

Anchor story

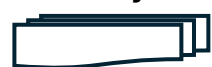

Not Selected story

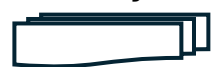

$\alpha$

Matching Aspects

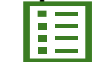

$\gamma$

Matching Aspects

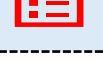

$\beta$

Distractors

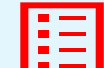

$\delta$

Distractors

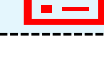

Difficulty-ordered  
Demonstration  
Curriculum

1. A, B, Easy
2. A, B, Med
3. A, B, Hard
