# Supplementary material
Source: ML conference proceedings conference paper supplement (https://aclanthology.org/2026.semeval-1.433)
Supplement: SupplementaryMaterial [file narrative_sim_1.pdf › images/narrative_sim_1.pdf]

# Anchor

## Theme:

Tradition vs modernity;  
family/parenthood complexities.

## Course of Action:

- Sasthri cuts ties with doctor Bharathi
- Parvathi gets pregnant
- Parvathi seeks Bharathi's help
- Parvathi gives birth
- Parvathi also adopts another newborn
- Sasthri is confused about which child is biological
- adopted child is raised in the family while biological son grows up elsewhere
- the two boys later become friends
- reconciliation follows

## Outcome:

Family reunites; both children are accepted; divide between tradition and modernity is bridged.

# Text A

## Theme:

Justice + mother-child bond under legal/social barriers.

## Course of Action:

- Woman is falsely accused for husband's crime
- imprisoned
- gives birth in prison
- baby is put up for adoption
- new evidence frees her
- she searches for her daughter

## Outcome:

She is cleared and begins the reunion quest with her child.

# Text B

## Theme:

Identity search; emotional complexity of adoption/family ties.

## Course of Action:

- Ben is raised by adoptive parents
- decides to meet biological parents
- learns biological mother has died
- finds biological father is in psychiatric care
- processes disappointment/loss

## Outcome:

Confronts painful reality of biological family; reflects on identity and what "family" means.
