# Supplementary material
Source: ML conference proceedings conference paper supplement (https://aclanthology.org/2026.semeval-1.433)
Supplement: SupplementaryMaterial [file narrative_sim_figure_1.pdf › latex/narrative_sim_figure_1.pdf]

## System Prompt

### Instructions

Definition of Aspects

Contrastive Curriculum Reasoning

Distractors to Ignore

Core Conceptualization

Tie-breaking Heuristics

### Difficulty-ordered Demonstration Curriculum

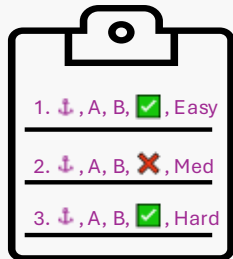

## User Prompt

Anchor

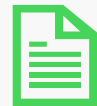

Text A

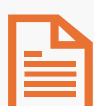

Text B

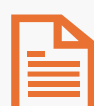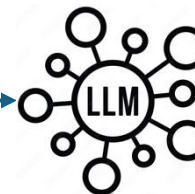

Output  
Decision

## Annotation Guidelines

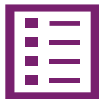

### Annotations

Aspect- based Contrastive Reasoning

Selected Narrative

Contributing Aspects

Final Explanations

Human Annotator

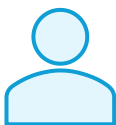

1. ⬇️, A, B,

2. ⬇️, A, B,

3. ⬇️, A, B,

Demonstrations

## Difficulty Scoring Mechanism

### Stage 1

Selected story

Easy

Medium

Hard

Matching Aspects

3

2

1

### Stage 2

Not Selected story

Easy

Medium

Hard

Matching Aspects

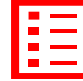

Distractors

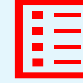

Difficulty-ordered  
Demonstration  
Curriculum

1. ⬇️, A, B, , Easy

2. ⬇️, A, B, , Med

3. ⬇️, A, B, , Hard
