# Supplementary material
Source: ML conference proceedings conference paper supplement (https://aclanthology.org/2026.semeval-1.433)

## Data Input and Narrative Dimensions

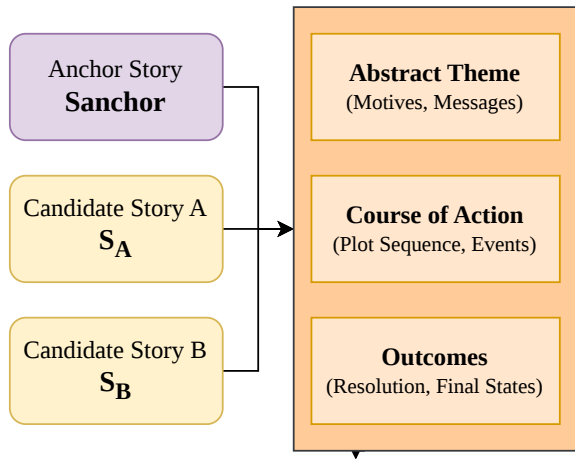

## Task Tracks and Evaluation

### Track A: Triples Classification

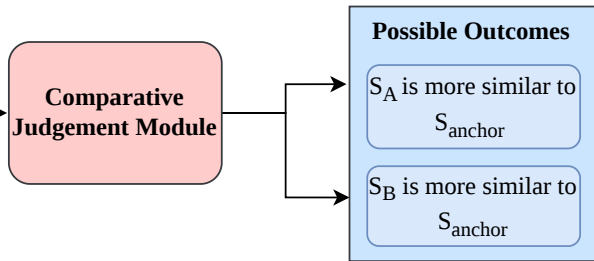

### Track B: Narrative Representation Learning

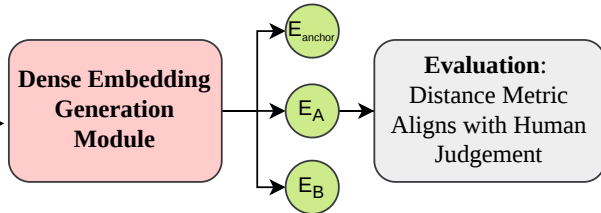

Supplement: SupplementaryMaterial [file task_introduction.drawio.pdf › latex/task_introduction.drawio.pdf]
