# Supplementary material
Source: ML conference proceedings conference paper supplement (https://aclanthology.org/2026.semeval-1.433)

## Comparative Narrative Similarity (Track A)

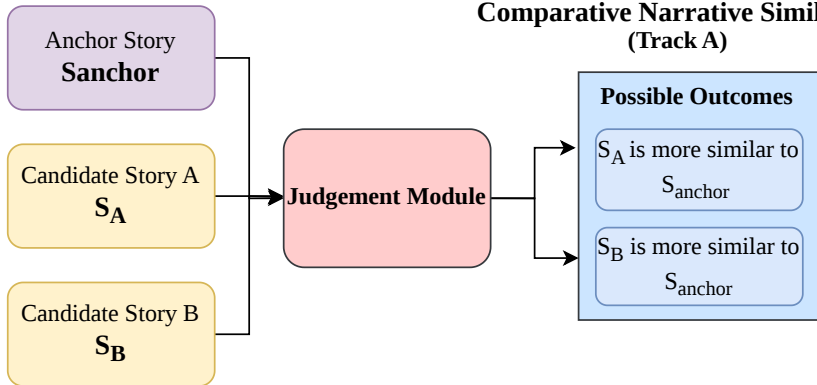

Supplement: SupplementaryMaterial [file introduction.pdf › latex/introduction.pdf]

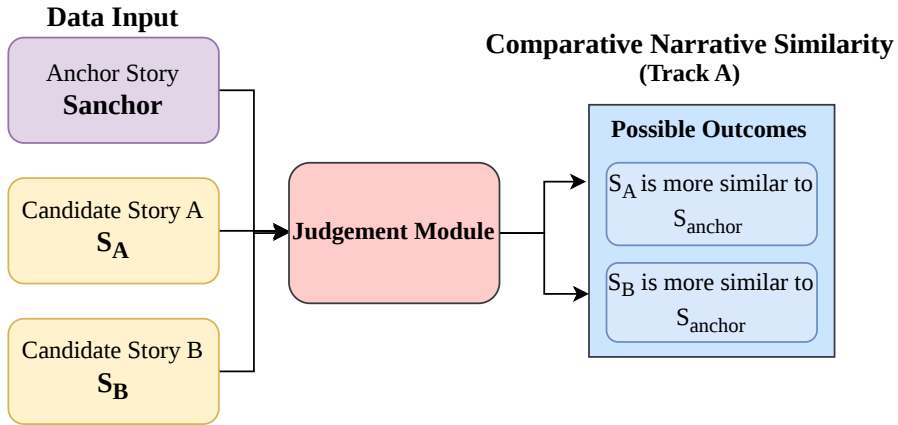

Supplement: SupplementaryMaterial [file introduction_task.pdf › latex/introduction_task.pdf]

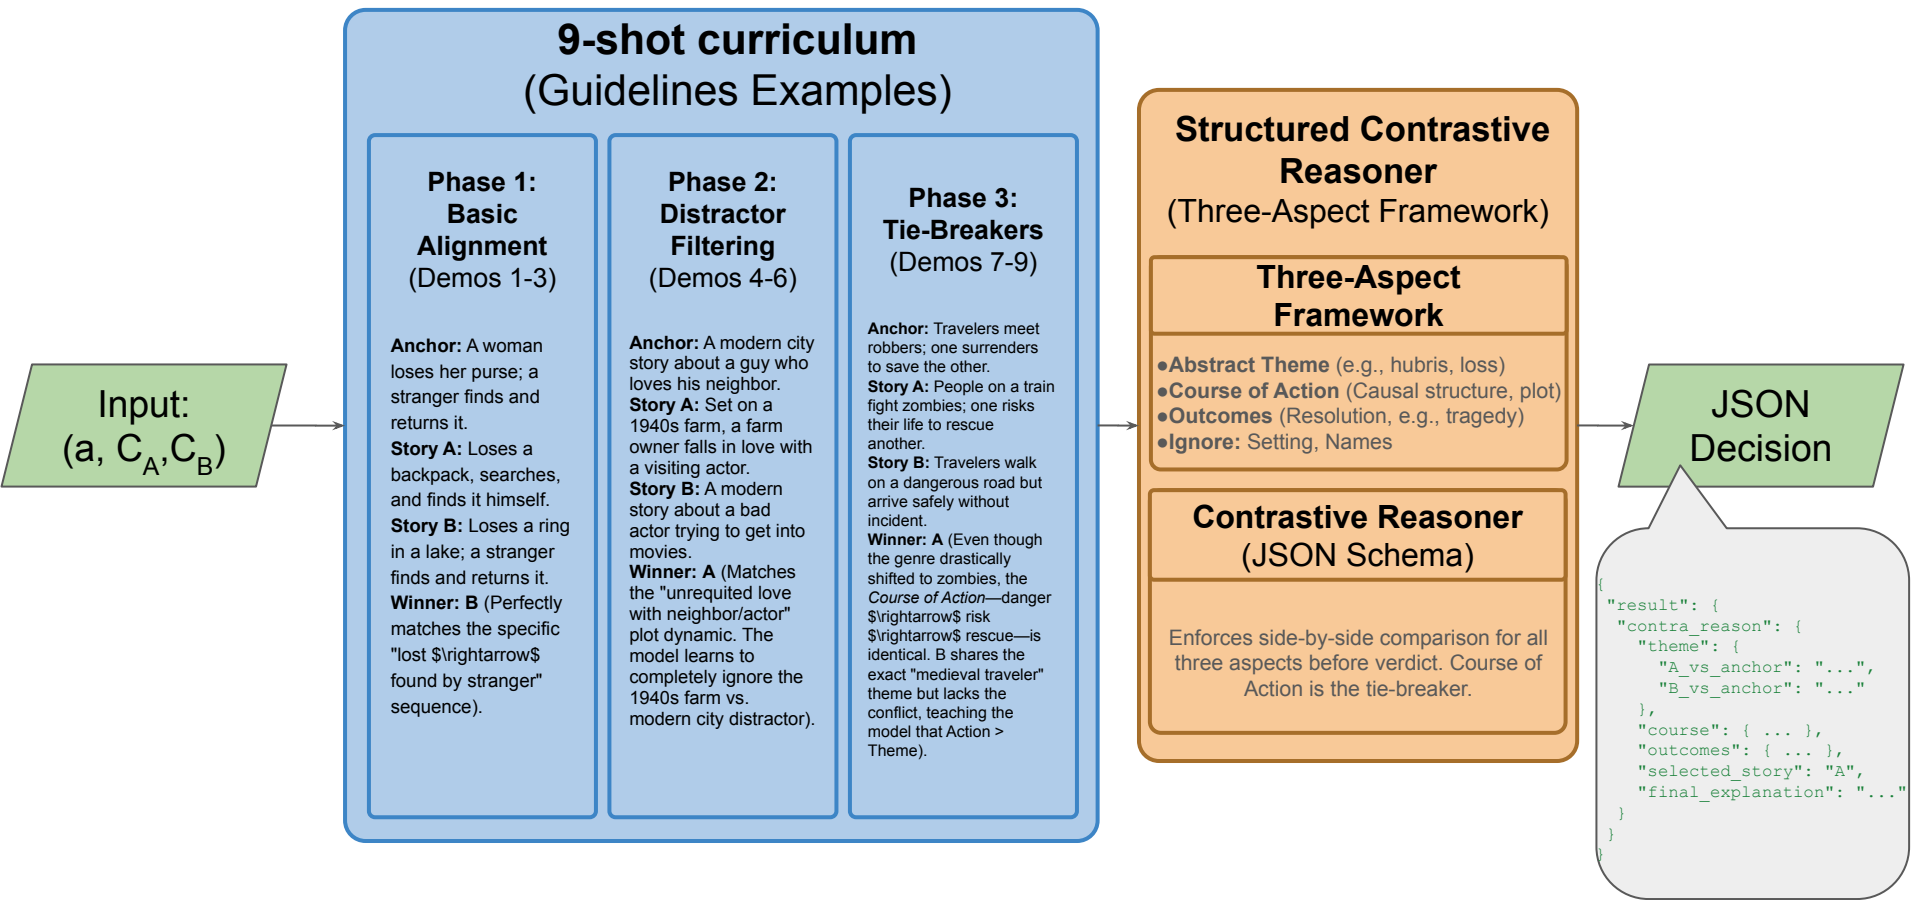

Supplement: SupplementaryMaterial [file methodology.pdf › latex/methodology.pdf]
